# Supplementary material for: The dynamic CO2 adsorption of polyethylene polyamine-loaded MCM-41 before and after methoxypolyethylene glycol codispersion
Source: Royal Society of Chemistry journal article supplement (doi:10.1039/c9ra05404a), 2019-01-01
Supplement: c9ra05404a1.pdf [file c9ra05404a1.pdf]

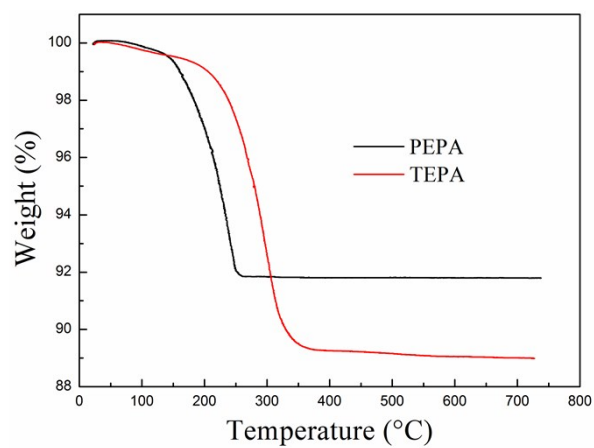

**Fig.1S** The thermal gravimetric curves for PEPA and TEPA.

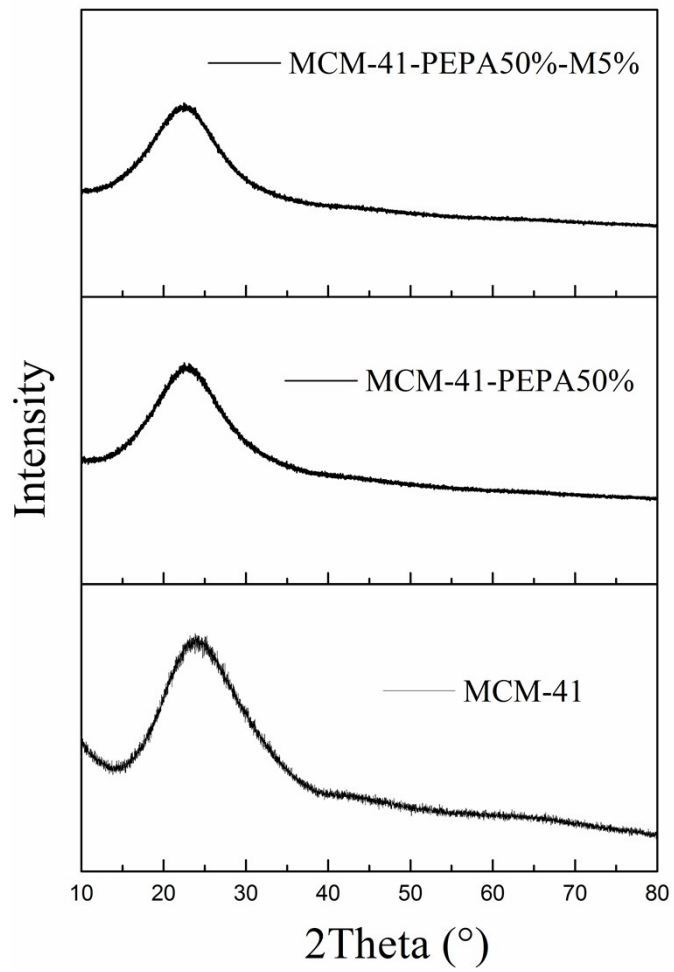

**Fig.2S** The XRD patterns for MCM-41 before and after PEPA and MPEG codispersion.

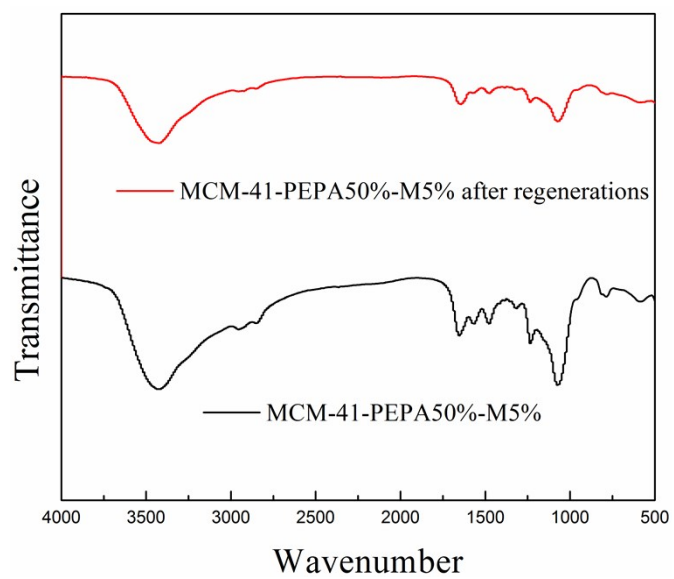

**Fig.3S** The FT-IR spectra for MCM-41-PEPA50%-M5% before and after 10 cycles.

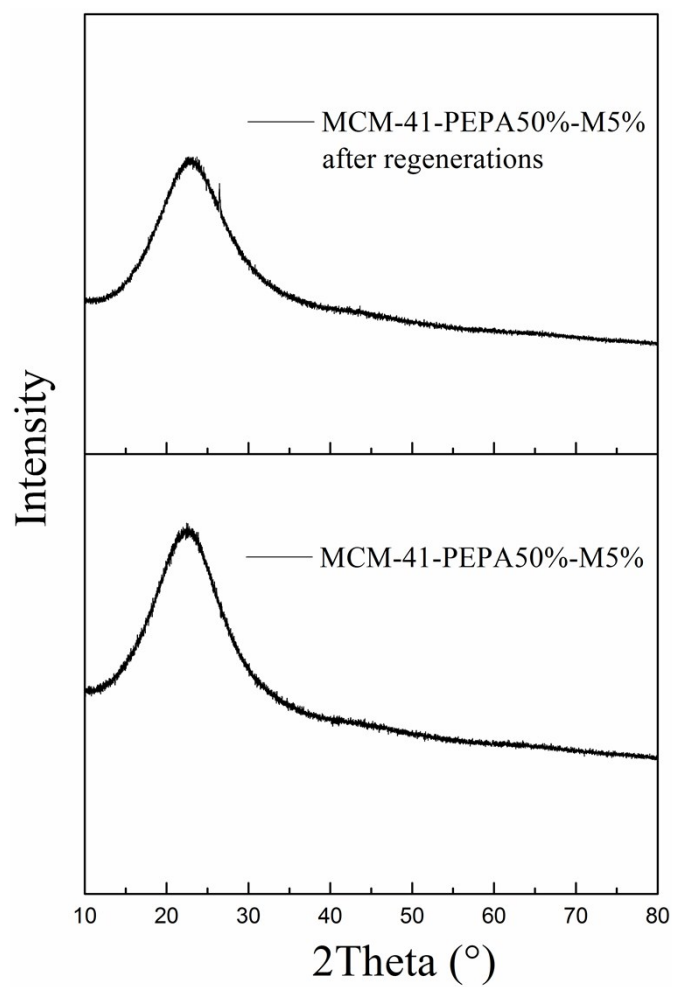

**Fig.4S** The XRD patterns for MCM-41-PEPA50%-M5% before and after 10 cycles.
